# Supplementary material for: Phosphoric acid densified red emissive carbon dots with a well-defined structure and narrow band fluorescence for intracellular reactive oxygen species detection and scavenging
Source: Royal Society of Chemistry journal article supplement (doi:10.1039/d2tc04897c), 2023-01-01
Supplement: d2tc04897c1.pdf [file d2tc04897c1.pdf]

## Supporting Information

### **Phosphoric acid densified red emissive carbon dots with well-defined structure and narrow band fluorescence for intracellular reactive oxygen species detection and scavenging**

Yalan Xu<sup>a</sup>, Chan Wang<sup>a</sup>, Laizhi Sui<sup>b</sup>, Guoxia Ran<sup>a</sup>, Qijun Song<sup>a\*</sup>

<sup>a</sup> Key Laboratory of Synthetic and Biological Colloids, Ministry of Education, School of Chemical and Material Engineering, Jiangnan University, Wuxi 214122, China.

<sup>b</sup> State Key Laboratory of Molecular Reaction Dynamics, Dalian Institute of Chemical Physics, Chinese Academy of Sciences, Dalian, 116023, China

#### **Materials**

Catechol, resorcinol, hydroquinone, phloroglucinol, p-phenylenediamine, o-phenylenediamine, 4-aminophenol, phosphate (H<sub>3</sub>PO<sub>4</sub>), and microporous membrane (0.22 μm, mixed fiber-water system) were purchased from Sinopharm Chemical Reagent Co., Ltd. Sodium hypochlorite (NaClO), ferrous sulfate (FeSO<sub>4</sub>), and hydrogen peroxide (H<sub>2</sub>O<sub>2</sub>), were obtained from Sigma–Aldrich, USA. Xanthine and xanthine oxidase were obtained from Yuanye Co., Ltd. (Shanghai, China). 5, 5-dimethyl-1-pyrroline N-oxide (DMPO) was purchased from Energy Chemical Co. Ltd and stored at 4 °C. The cytotoxicity detection kit Cell Counting Kit-8 (CCK-8), apoptosis kit (Annexin V-FITC, PI and binding buffer (BB)) and reactive oxygen species assay kit 2, 7-Dichlorodi-hydrofluorescein diacetate (DCFH-DA) were obtained from Beyotime Co., Ltd.

#### **Instruments**

The morphologies of samples were characterized on a JEM-2100 plus (Japan) transmission electron microscope (TEM) and high-resolution TEM (HRTEM) with a voltage of 200 kV. Atomic force microscope (AFM) images were taken by a Veeco Nanoscope Quadrex AFM (Bruker, Germany). The photoluminescence (PL) spectra and absolute quantum yield (QY) of OR-CDs were tested by a time-resolved and

steady state fluorescence spectrometer Horiba JobinYvon FluoroMax 4C-L (France). Fluorescence lifetimes of OR-CDs were obtained on ultrafast time-resolved fluorescence lifetime spectrometer FL 980 (Lifespec II, Edinburgh Instruments). Femtosecond transient absorption (fs-TA) spectra of R-CDs were carried out at 400 nm excitation, and the setup was provided by the Dalian Institute of Chemical Physics, Chinese Academy of Science. UV-vis absorbance spectra were measured by UV-3600 spectrophotometer (Shimadzu, Kyoto, Japan). Fourier transform infrared (FT-IR) spectra were recorded by an infrared spectrophotometer (Thermo Fisher Scientific, USA). The dynamic light scattering (DLS) and zeta potential were measured by a nano particle size analyzer (Zeta PALS, Brookhaven, USA). Thermal stability property of OR-CDs was analyzed by thermogravimetric (TGA) analyser under N<sub>2</sub> atmosphere from 25 °C to 800 °C with the heating rate of 5 °C min<sup>-1</sup> (Mettler Toledo, Switzerland). Differential scanning calorimetry (DSC) measurements were carried out on a thermogravimetric analysis (TA) instrument (New Castle, USA). X-ray photoelectron spectra (XPS) were measured by an X-ray photoelectron spectrometer with Al K $\alpha$  (1486.6 eV) radiation. High performance liquid chromatography (HPLC) was conducted by a high pressure liquid chromatograph (1525, Waters, USA), and the mobile phases are acetonitrile, water and methanol. Ultra-high performance liquid chromatography tandem quadrupole time-of-flight mass spectrometer (LC-MS) was used to identify the R-CDs in low molecular fractions (MALDI SYNAPT MS, Waters, USA). Cytotoxicity was evaluated on a full-function microplate detector (Synergy H4, China). The confocal microscopy images were collected using the confocal fluorescence microscope (Carl Zeiss LSM880). The apoptotic and necrotic cells were analyzed by a flow cytometer (BD Accuri C6 Plus USA). A LED hand lamp (yellow light, 0.088 W cm<sup>-2</sup>) was used as the light source, which has a center wavelength at 590 nm (Kiwi Photoelectric Co., Ltd. Shenzhen, China).

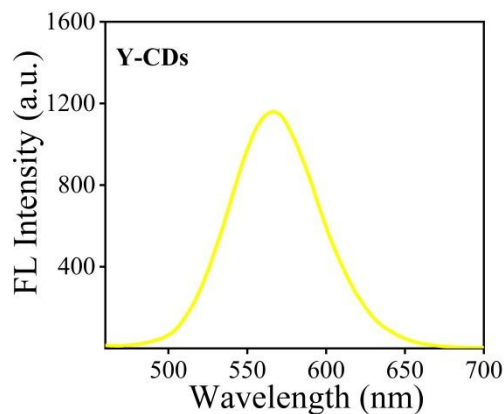

**Fig. S1** The fluorescence spectra of Y-CDs, inset: Inset: the optical photographs of Y-CDs solution under daylight (left) and UV (365 nm, right).

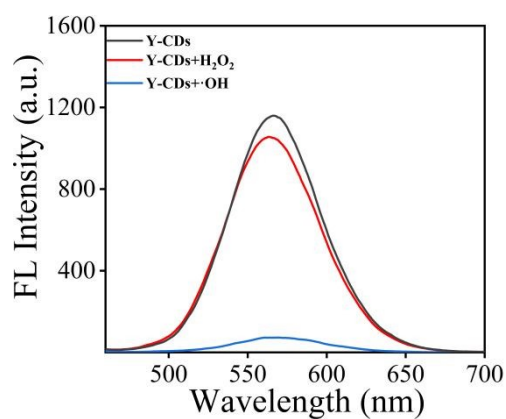

**Fig. S2** The fluorescence spectra of Y-CDs in presence of ROS. Y-CDs were prepared from OPD and catechol by hydrothermal treatment at 180 °C for 5 h. ROS were added to Y-CDs solution, respectively, including 20  $\mu\text{M}$  H<sub>2</sub>O<sub>2</sub>, or 20  $\mu\text{M}$  ·OH.

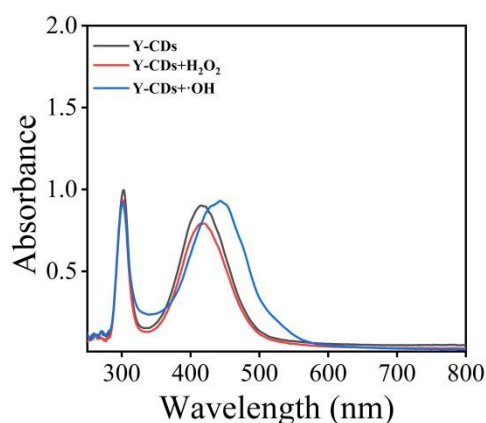

**Fig. S3** The UV-vis absorbance spectra of Y-CDs in presence of ROS. Y-CDs were prepared from OPD and catechol by hydrothermal treatment at 180 °C for 5 h. ROS were added to Y-CDs solution, respectively, including 20  $\mu\text{M}$  H<sub>2</sub>O<sub>2</sub>, or 20  $\mu\text{M}$  ·OH.

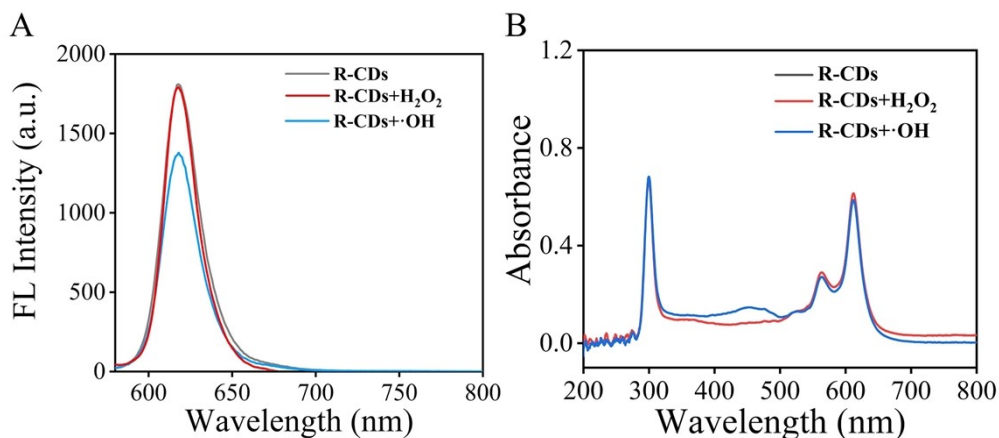

**Fig. S4** (A) The fluorescence spectra of R-CDs in presence of ROS, which were prepared from Y-CDs by hydrothermal treatment  $\text{H}_3\text{PO}_4$  at 180 °C for 1 h. ROS including 20  $\mu\text{M}$   $\text{H}_2\text{O}_2$ , 20  $\mu\text{M}$  or  $\cdot\text{OH}$  were added to R-CDs solution, respectively. (B) The UV-vis absorbance spectra of R-CDs in presence of ROS, which were prepared from Y-CDs by hydrothermal treatment  $\text{H}_3\text{PO}_4$  at 180 °C for 1 h. ROS including 20  $\mu\text{M}$   $\text{H}_2\text{O}_2$ , or 20  $\mu\text{M}$   $\cdot\text{OH}$  were added to CDs solution, respectively.

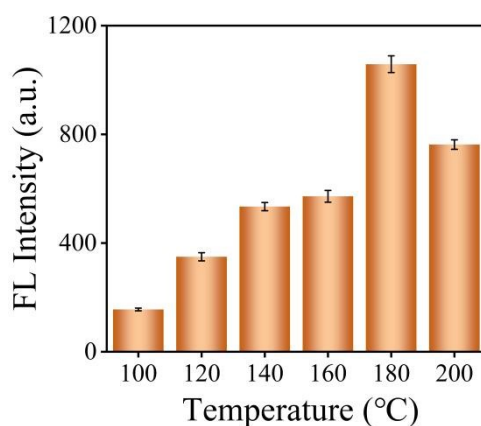

**Fig. S5** Fluorescent intensity of the products prepared from different hydrothermal temperatures, inset: photograph of corresponding products under daylight.

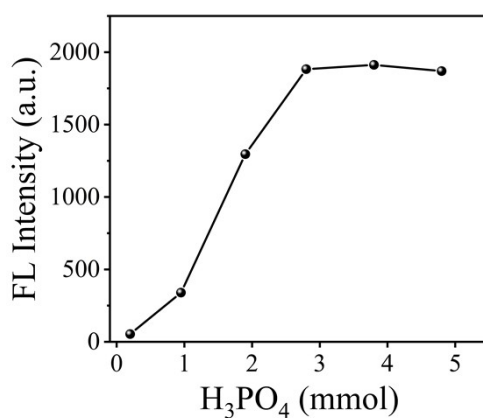

**Fig. S6** The fluorescence intensity of the hydrothermal products obtained from adding different amounts of  $\text{H}_3\text{PO}_4$  to they-CDs solution at 180 °C for 1 h.

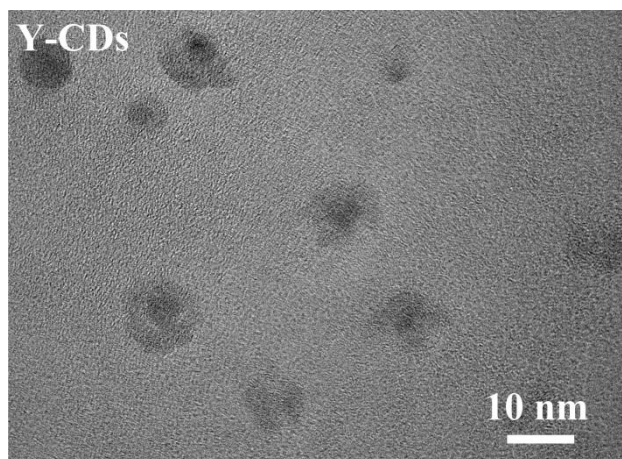

**Fig. S7** HRTEM image of Y-CDs.

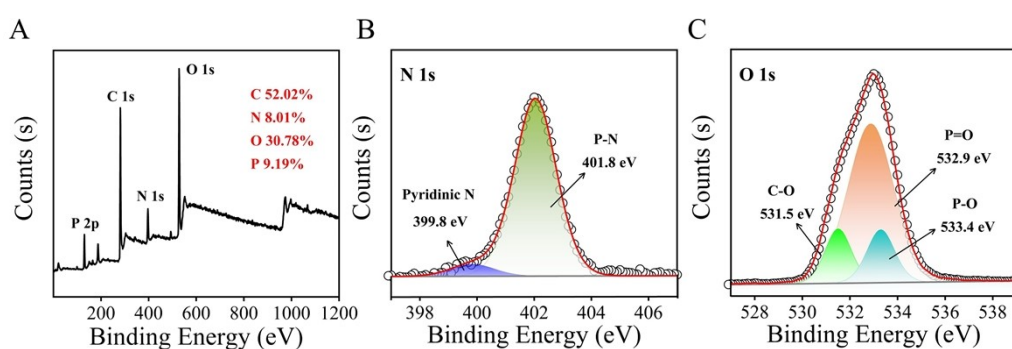

**Fig. S8** (A) Survey of XPS spectrum of R-CDs (B-C) High-resolution XPS spectra of N 1s and O 1s for the R-CDs

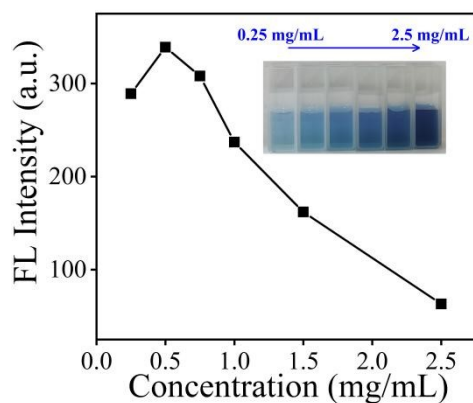

**Fig. S9** Fluorescent intensities of different concentration R-CDs solutions, inset: the photographs of corresponding R-CDs solutions under daylight.

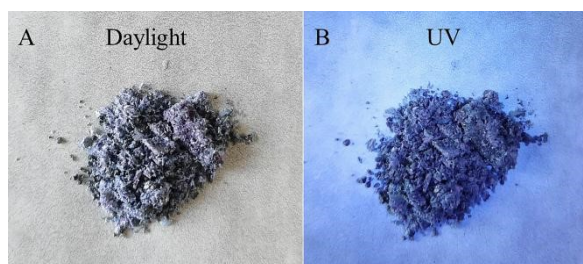

**Fig. S10** Photos of R-CDs powders under (A) daylight and (B) UV light

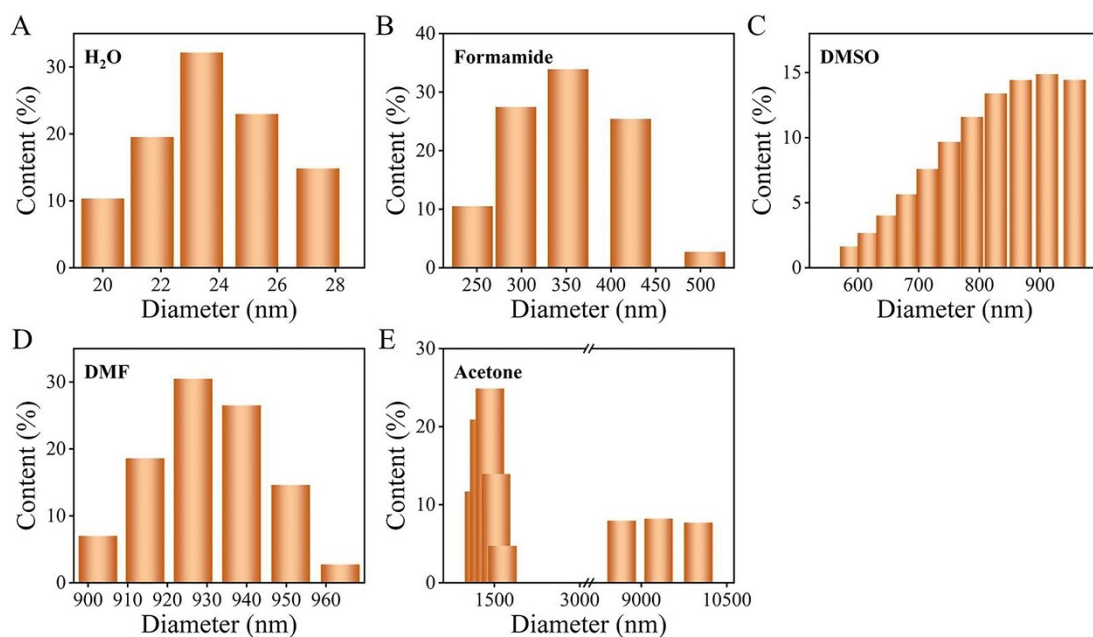

**Fig. S11** The hydrodynamic diameters of 0.50 mg/mL R-CDs in different solvents determined by dynamic light scattering (DLS) (A) H<sub>2</sub>O; (B) Formamide; (C) DMSO; (D) DMF; and (E) Acetone.

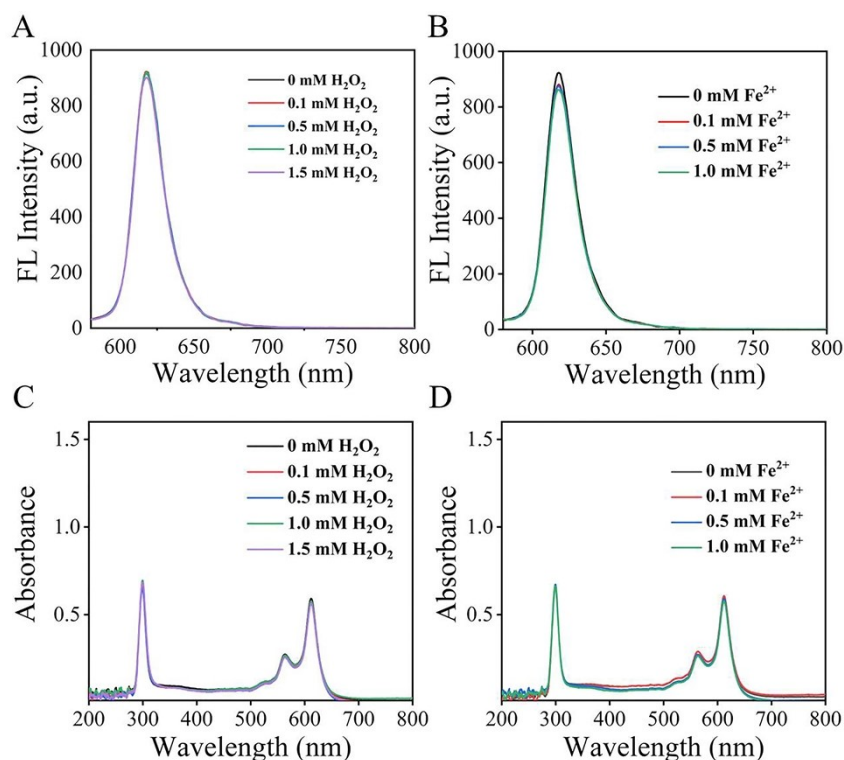

**Fig. S12** (A) The fluorescence spectra of R-CDs in presence of different concentrations of H<sub>2</sub>O<sub>2</sub>. (B) The fluorescence spectra of R-CDs in presence of different concentration Fe<sup>2+</sup>. (C) The UV-vis absorbance spectra of R-CDs in presence of different concentration H<sub>2</sub>O<sub>2</sub>. (D) The UV-vis absorbance spectra in presence of different concentration Fe<sup>2+</sup>.

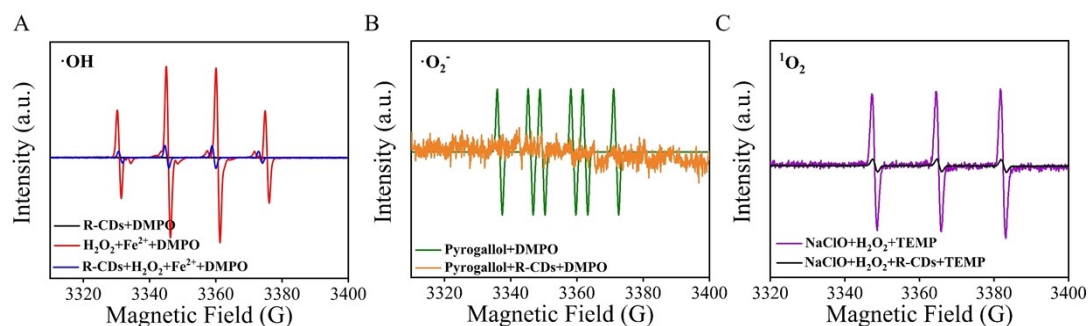

**Fig. S13** ESR analysis: (A) ESR spectra of the samples containing DMPO,  $\text{Fe}^{2+}$ ,  $\text{H}_2\text{O}_2$  with and without R-CDs. (B) ESR spectra of the samples containing DMPO, pyrogallol with and without R-CDs. (C) ESR spectra of the samples containing DMPO,  $\text{NaClO}$ ,  $\text{H}_2\text{O}_2$  with and without R-CDs.

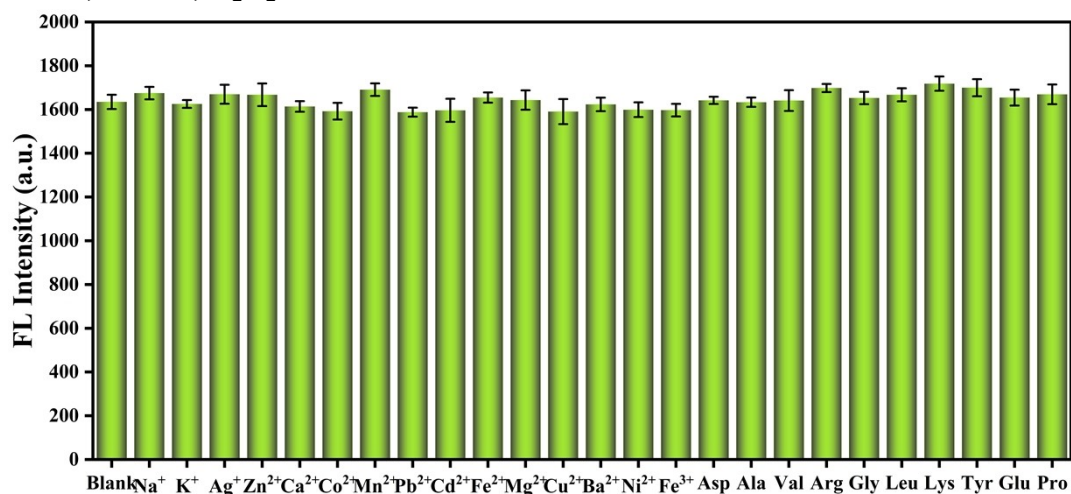

**Fig. S14** Influence of metal ions and biomolecules on the fluorescence intensity of the 0.5 mg/mL R-CDs. The test metal ions or biomolecules include 20  $\mu\text{M}$   $\text{Na}^+$ ,  $\text{K}^+$ ,  $\text{Ag}^+$ ,  $\text{Zn}^{2+}$ ,  $\text{Ca}^{2+}$ ,  $\text{Co}^{2+}$ ,  $\text{Mn}^{2+}$ ,  $\text{Pb}^{2+}$ ,  $\text{Cd}^{2+}$ ,  $\text{Fe}^{2+}$ ,  $\text{Mg}^{2+}$ ,  $\text{Cu}^{2+}$ ,  $\text{Ba}^{2+}$ ,  $\text{Ni}^{2+}$ ,  $\text{Fe}^{3+}$ , aspartic acid (Asp), alanine (Ala), valine (Val), arginine (Arg), glycine (Gly), leucine (Leu), lysine (Lys), tyrosine (Tyr), glutamic acid (Glu), or proline (Pro).

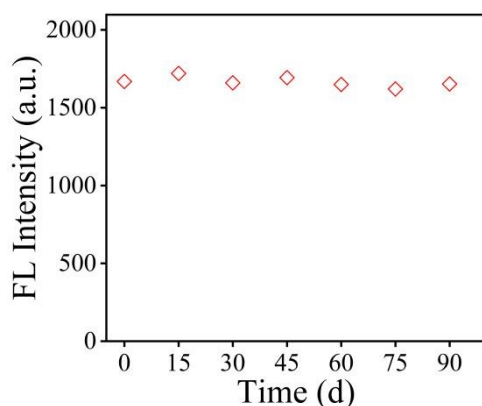

**Fig. S15** Fluorescence intensity of R-CDs solution stored different time.



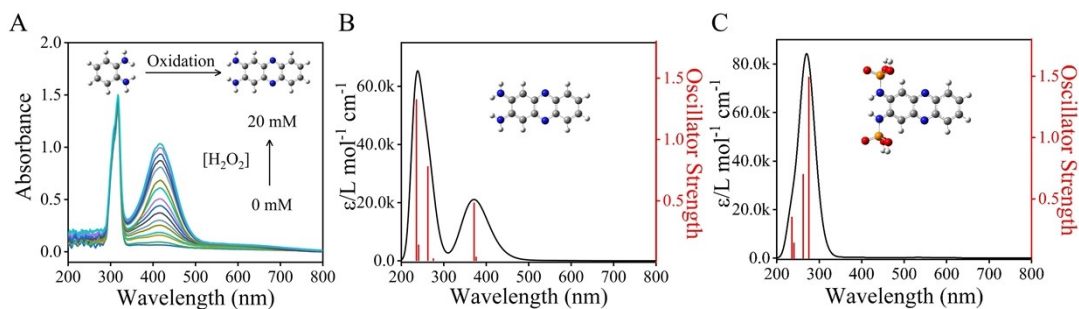

**Fig. S16** (A) The UV-vis absorbance spectra during the oxidation of o-phenylenediamine by  $\text{H}_2\text{O}_2$ , (The concentration of o-phenylenediamine is 1.0 mM; the concentration of  $\text{H}_2\text{O}_2$  is ranging from 0 to 20 mM). (B) The DFT calculated UV-vis absorbance spectrum of 2, 3-diaminophenazine. (C) The UV-vis absorbance spectra during the 2, 3-diaminophenazine protected by phosphate groups.

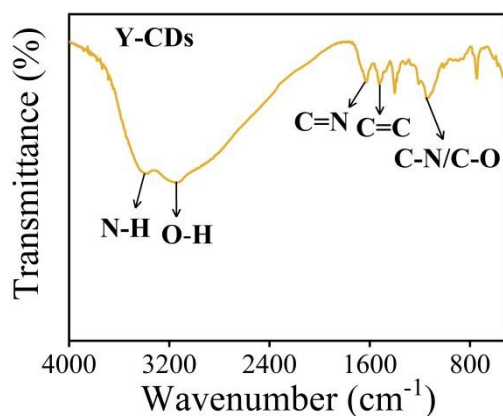

**Fig. S17** The FT-IR spectra of Y-CDs.

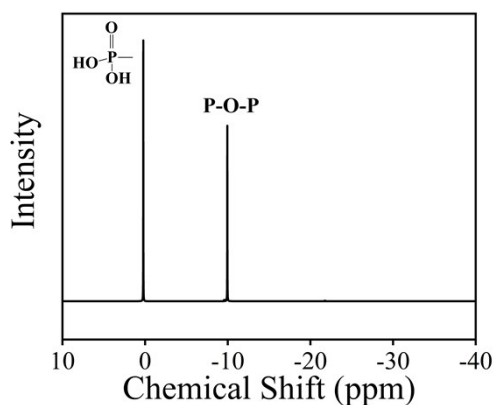

**Fig. S18** The  $^{31}\text{P}$  NMR spectrum of R-CDs



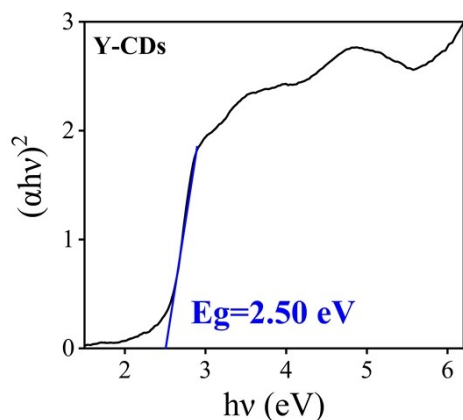

**Fig. S19** Plot of  $(\alpha hv)^2$  versus  $(hv)$  for the band gap energy of Y-CDs  
The band gap energy ( $E_g$ ) values of all optimized geometries can be estimated from the DRS by using the formula:<sup>1</sup>

$$\alpha hv = K(hv - E_g)^n$$

Where  $\alpha$  refers to the absorption coefficient,  $hv$  is the energy of the incident light,  $E_g$  is the energy gap and  $n$  is a number which characterizes the optical absorption processes.

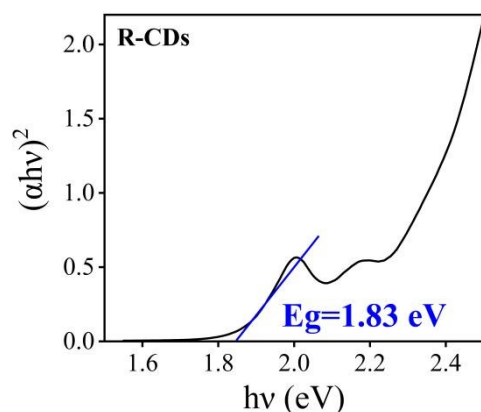

**Fig. S20** Plot of  $(\alpha hv)^2$  versus  $(hv)$  for the band gap energy of R-CDs

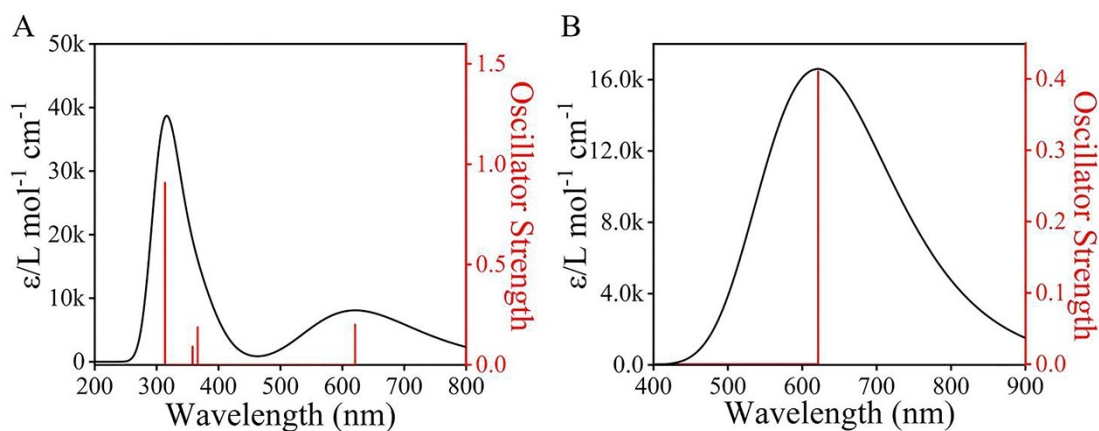

**Fig. S21** (A) The calculated absorption spectrum of R-CDs (B) The calculated fluorescence spectrum of R-CDs

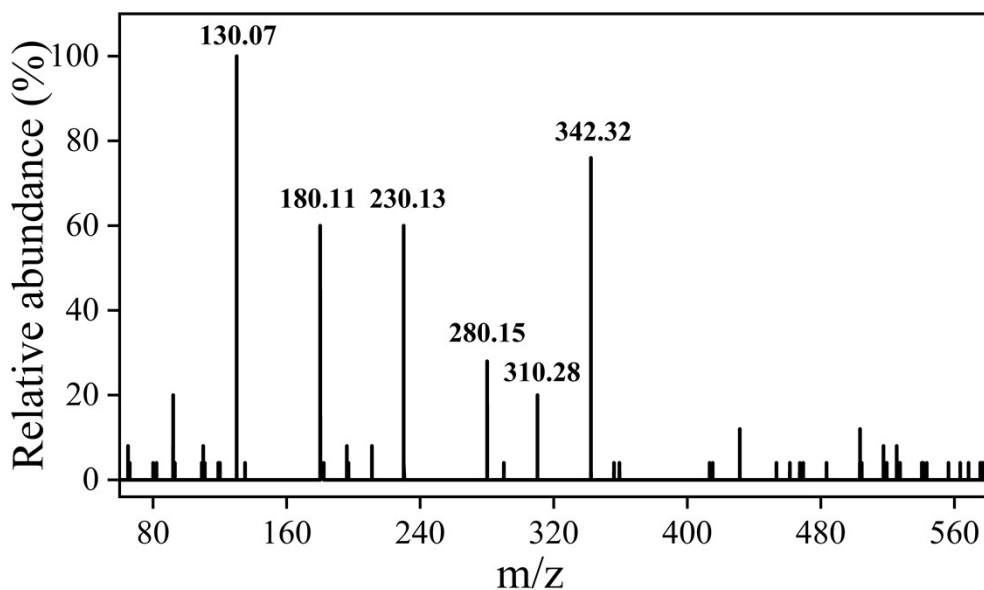

**Fig. S22** Mass spectrum of Y-CDs

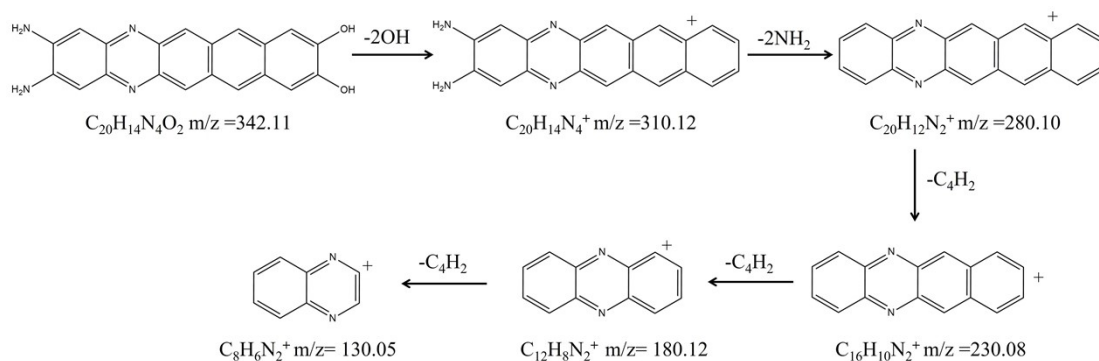

**Fig. S23** The proposed decomposition process of Y-CDs

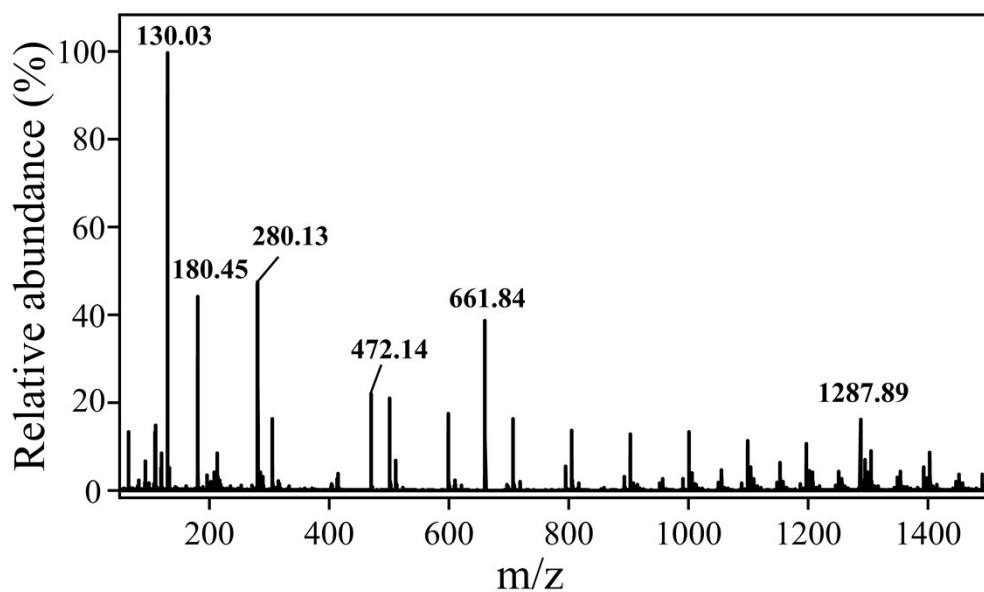

**Fig. S24** Mass spectrum of R-CDs

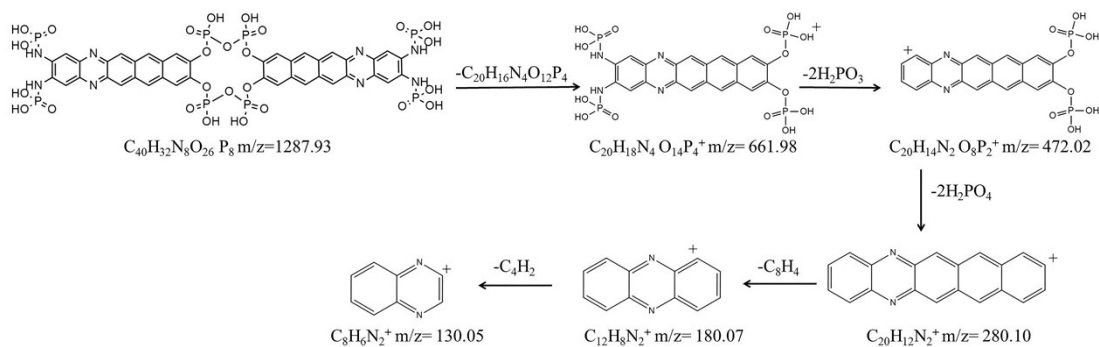

**Fig. S25** The proposed decomposition process of R-CDs

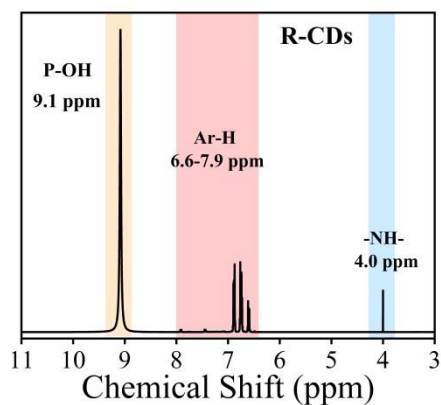

**Fig. S26** The  $^1H$ -NMR spectrum of R-CDs in DMSO- $d_6$

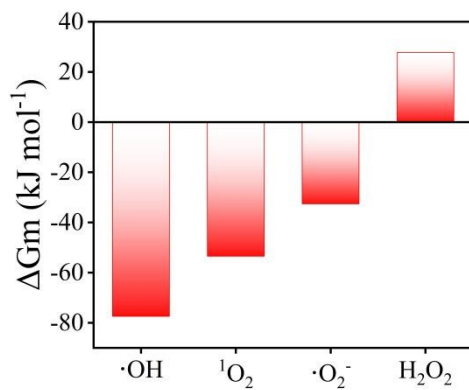

**Fig. S27** Theoretically calculated  $\Delta G_m$  of the reaction between R-CDs and  $\cdot OH$ ,  $^1O_2$ ,  $\cdot O_2^-$ , and  $H_2O_2$ , respectively.

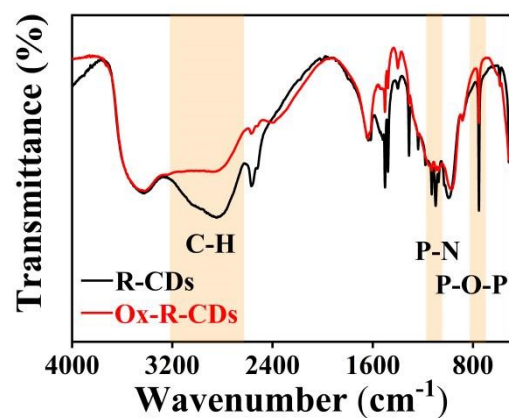

**Fig. S28** The FT-IR spectra of R-CDs and Ox-R-CDs

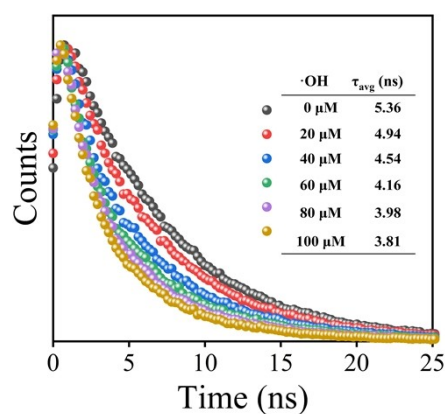

**Fig. S29** Lifetime decays of R-CDs with different concentration  $\cdot\text{OH}$

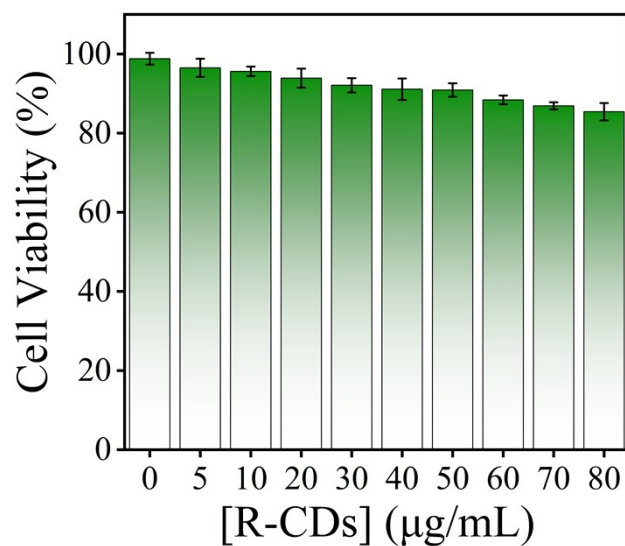

**Fig. S30** Viability of A549 cells incubated with different concentrations of R-CDs for 12 h.

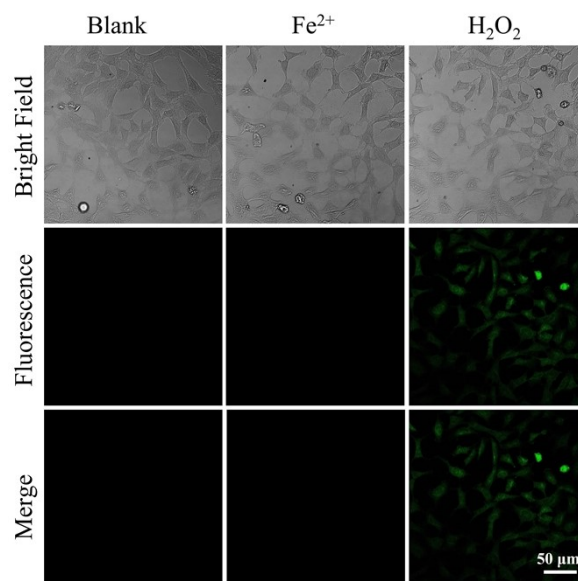

**Fig. S31** Confocal fluorescence images of A549 cells. The scale bar is 50  $\mu\text{m}$ . Three groups of A549 cells are respectively untreated, treated with 20  $\mu\text{M}$   $\text{Fe}^{2+}$  or treated with 10  $\mu\text{M}$   $\text{H}_2\text{O}_2$ .

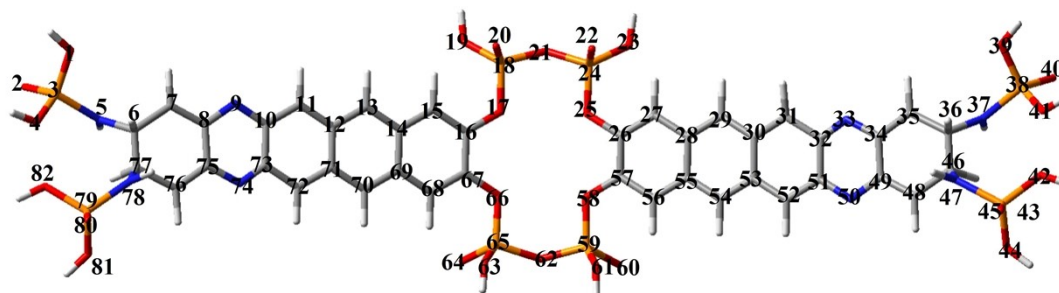

**Fig. S32** The structure of basic unit **5c-O/O-5c**

The two 5-member aromatic units are the basic unit of R-CDs, i.e., **5c-O/O-5c**, whose atoms are numbered, except for hydrogen (Fig. S32). The distance between atoms was estimated in Gauss View 5.0. As shown in Table S2, the distance between the atoms in **5c-O/O-5c** is ranging from 0.13 to 3.31 nm. According to TEM image in Fig. 1C, R-CDs exhibit good uniform dispersion of ca. 3.02 nm ranging from 2.15 to 4.25 nm quasi-spherical nanoparticles, and Fig. 1D illustrates that the R-CDs possess a narrow size distribution with an average height ca. 2.68 nm. Therefore, we tentatively concluded that the **5c-O/O-5c** basic units may be stacked in the R-CDs.

**Table S1** HOMO and LUMO energies and corresponding  $E_g$  values of the twenty one optimized structures.

|     | HOMO (eV) | LUMO (eV) | $E_g$ (eV) |
|-----|-----------|-----------|------------|
| 3   | -3.32     | 0.42      | 3.74       |
| 4-1 | -3.37     | -0.38     | 2.99       |
| 4-2 | -2.32     | 0.73      | 3.05       |
| 4-3 | -2.69     | 0.29      | 2.98       |
| 5-1 | -4.34     | -1.72     | 2.62       |

|     |       |       |      |
|-----|-------|-------|------|
| 5-2 | -4.49 | -1.99 | 2.50 |
| 4a  | -2.38 | 1.02  | 3.40 |
| 4b  | -4.03 | -1.45 | 2.58 |
| 4c  | -5.86 | -3.09 | 2.77 |
| 4d  | -2.89 | 0.04  | 2.93 |
| 4e  | -3.09 | -0.13 | 3.22 |
| 4f  | -5.99 | -3.25 | 2.74 |
| 4g  | -3.16 | -1.19 | 1.97 |
| 5a  | -3.07 | -0.51 | 2.56 |
| 5b  | -3.18 | -0.31 | 2.87 |
| 5c  | -3.16 | -1.26 | 1.90 |
| 5d  | -4.12 | -1.77 | 2.35 |
| 5e  | -3.47 | -1.92 | 1.55 |
| 5f  | -3.63 | -1.35 | 2.28 |
| 5g  | -4.02 | -1.95 | 2.07 |
| 5h  | -3.11 | -1.48 | 1.63 |

**Table S2** The distance between atoms of 5c-O/O-5c

| Atomic number | length (Å) | length (nm) |
|---------------|------------|-------------|
| 1→23          | 19.0       | 1.90        |
| 1→39          | 30.1       | 3.01        |
| 1→42          | 31.7       | 3.17        |
| 1→45          | 30.7       | 3.07        |
| 1→81          | 6.6        | 0.66        |
| 1→20          | 14.3       | 1.43        |
| 2→42          | 33.1       | 3.31        |
| 2→81          | 6.2        | 0.62        |
| 3→38          | 31.3       | 3.13        |
| 3→43          | 30.9       | 3.09        |
| 3→79          | 4.4        | 0.44        |
| 5→37          | 28.6       | 2.86        |
| 5→47          | 27.9       | 2.79        |
| 5→78          | 3.1        | 0.31        |
| 7→76          | 2.7        | 0.27        |

|       |      |      |
|-------|------|------|
| 8→75  | 1.3  | 0.13 |
| 19→23 | 5.4  | 0.54 |
| 19→44 | 20.0 | 2.00 |
| 19→63 | 7.6  | 0.76 |

---

### References

1. S. Chandra, P. Patra, S. H. Pathan, S. Roy, S. Mitra, A. Layek, R. Bhar, P. Pramanik and A. Goswami, *J. Mater. Chem. B*, 2013, **1**, 2375-2382.
